# Supplementary material for: DMSO containing ruthenium(ii) hydrazone complexes: in vitro evaluation of biomolecular interaction and anticancer activity
Source: Royal Society of Chemistry journal article supplement (doi:10.1039/c4dt01032a), 2014-09-16
Supplement: c4dt01032a1.pdf [file c4dt01032a1.pdf]

## Supporting Information

**DMSO containing ruthenium(II) hydrazone complexes: *In vitro* evaluation of biomolecular interaction and anticancer activity**

**M. Alagesan<sup>a</sup>, P. Sathyadevi<sup>a</sup>, P. Krishnamoorthy<sup>a</sup>, N.S.P. Bhuvanesh<sup>b</sup>,  
N. Dharmaraj<sup>a,\*</sup>**

<sup>a</sup>*Inorganic & Nanomaterials Research Laboratory, Department of Chemistry, Bharathiar University, Coimbatore – 641 046, India. E-mail: dharmaraj@buc.edu.in; Tel.: +91 422 2428319; Fax: +91 422 2422387.*

<sup>b</sup>*Department of Chemistry, Texas A&M University, College Station, TX 77843, U.S.A.*

†Electronic supplementary information (ESI) available:

CCDC reference numbers 838986 and 852727 for complex 2 and 4. For ESI and crystallographic data in CIF or other electronic format see DOI:

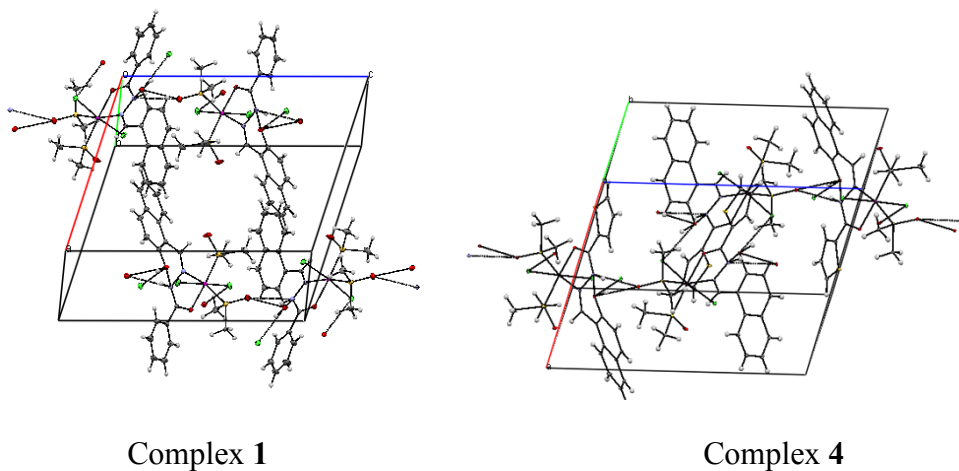

**Figure S1** Packing diagrams of complexes 1 and 4 showing inter-molecular hydrogen bonding.

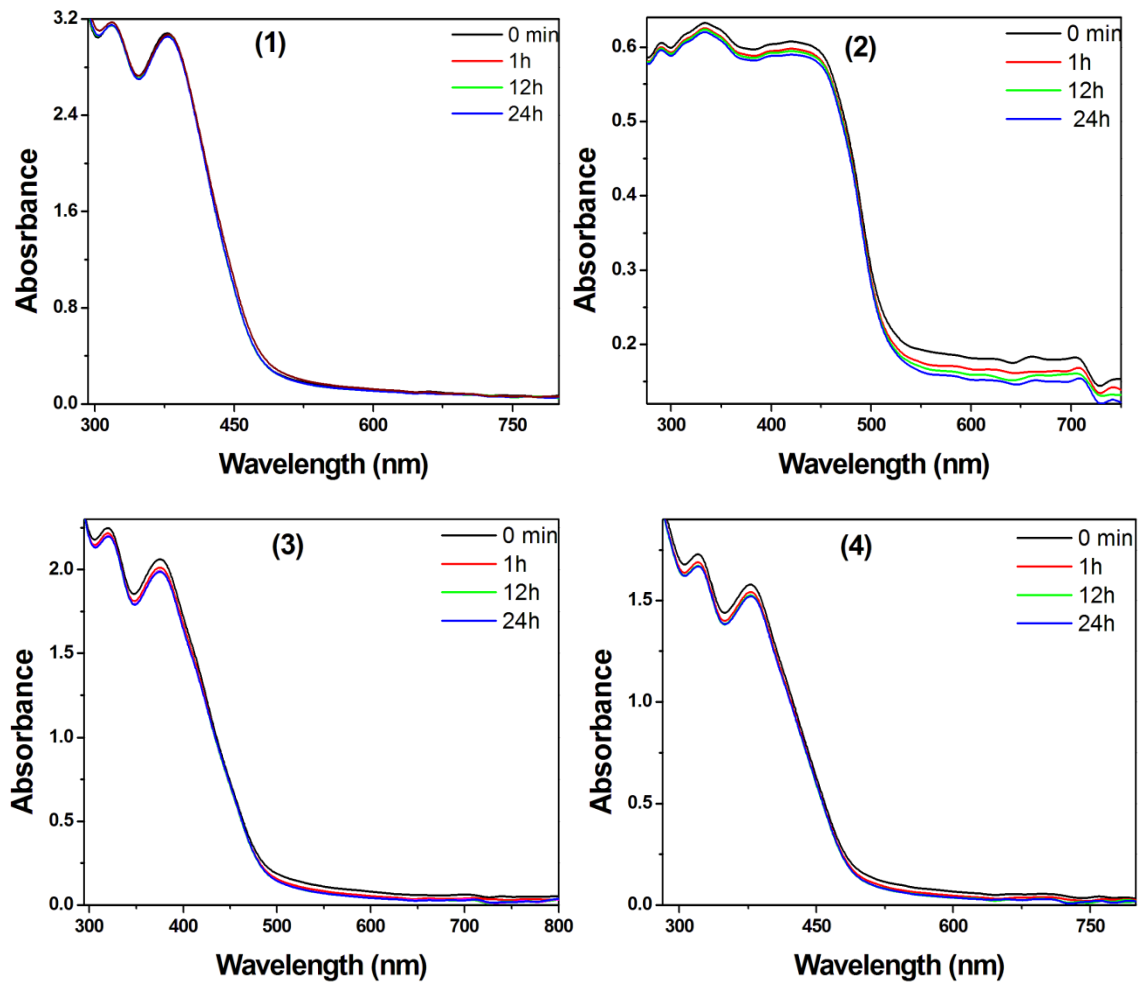

Figure S2 UV-visible absorption spectra of complexes 1, 2, 3 and 4 in aqueous PBS buffer at pH 7.4.

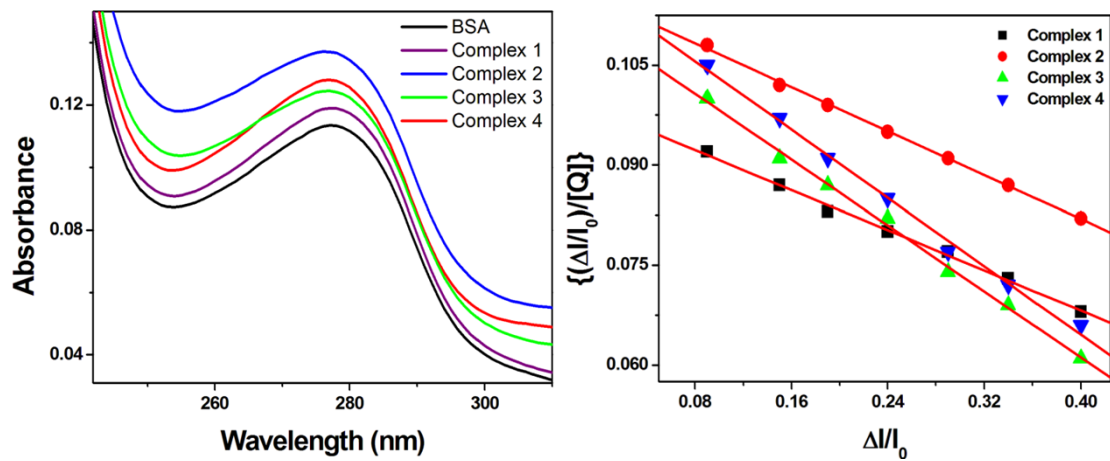

**Figure S3** Electronic absorption spectra of BSA (10  $\mu\text{M}$ ), with ligands and complexes and Scatchard plots of the fluorescence titration of the complexes with BSA.

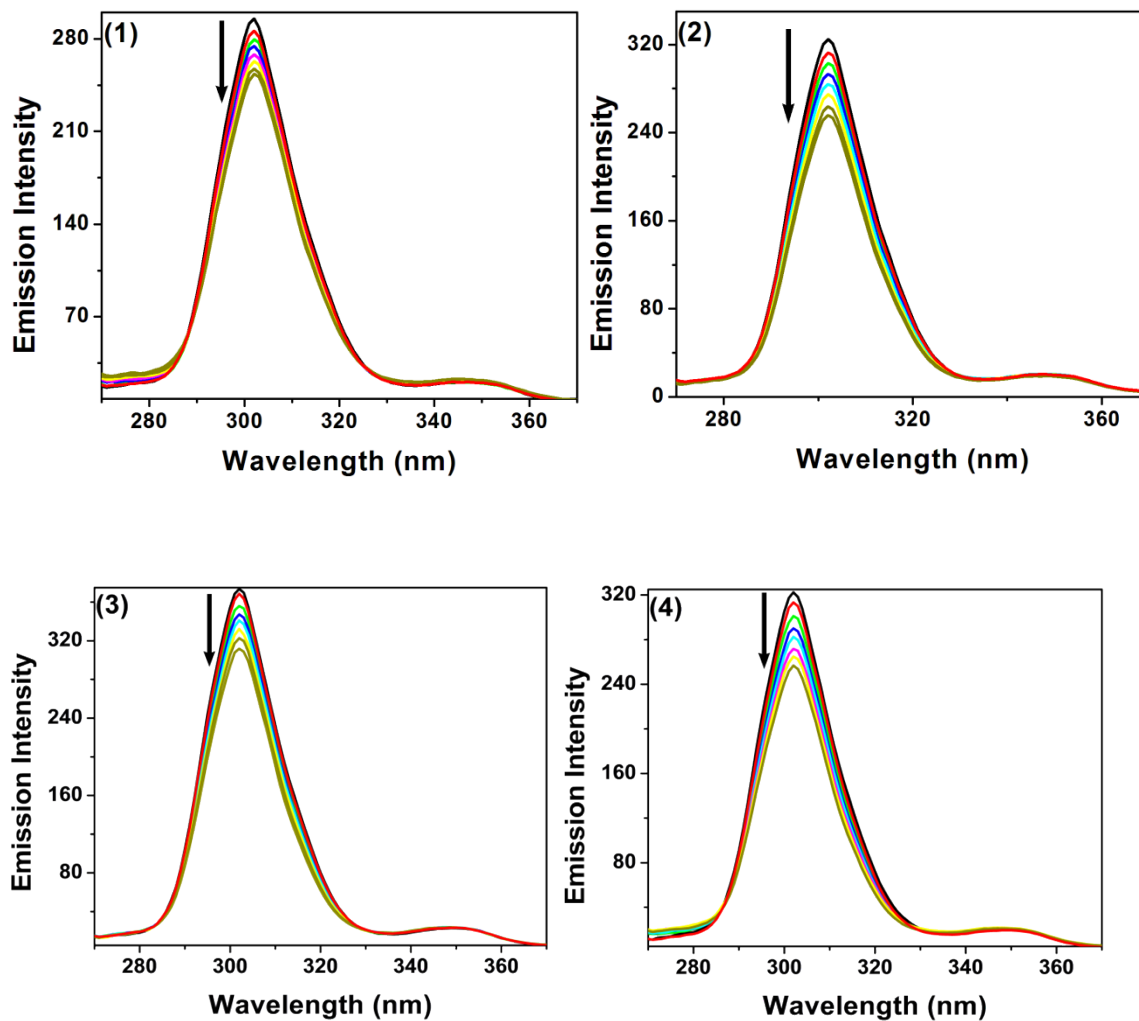

**Figure S4** Synchronous spectra of BSA (1  $\mu\text{M}$ ) in the presence of increasing amounts of the complexes **1**, **2**, **3** and **4** (0-14  $\mu\text{M}$ ) at a wavelength difference of  $\Delta\lambda = 15$  nm. Arrow indicates the decrease of emission intensity as a function of increasing concentration of the compounds.

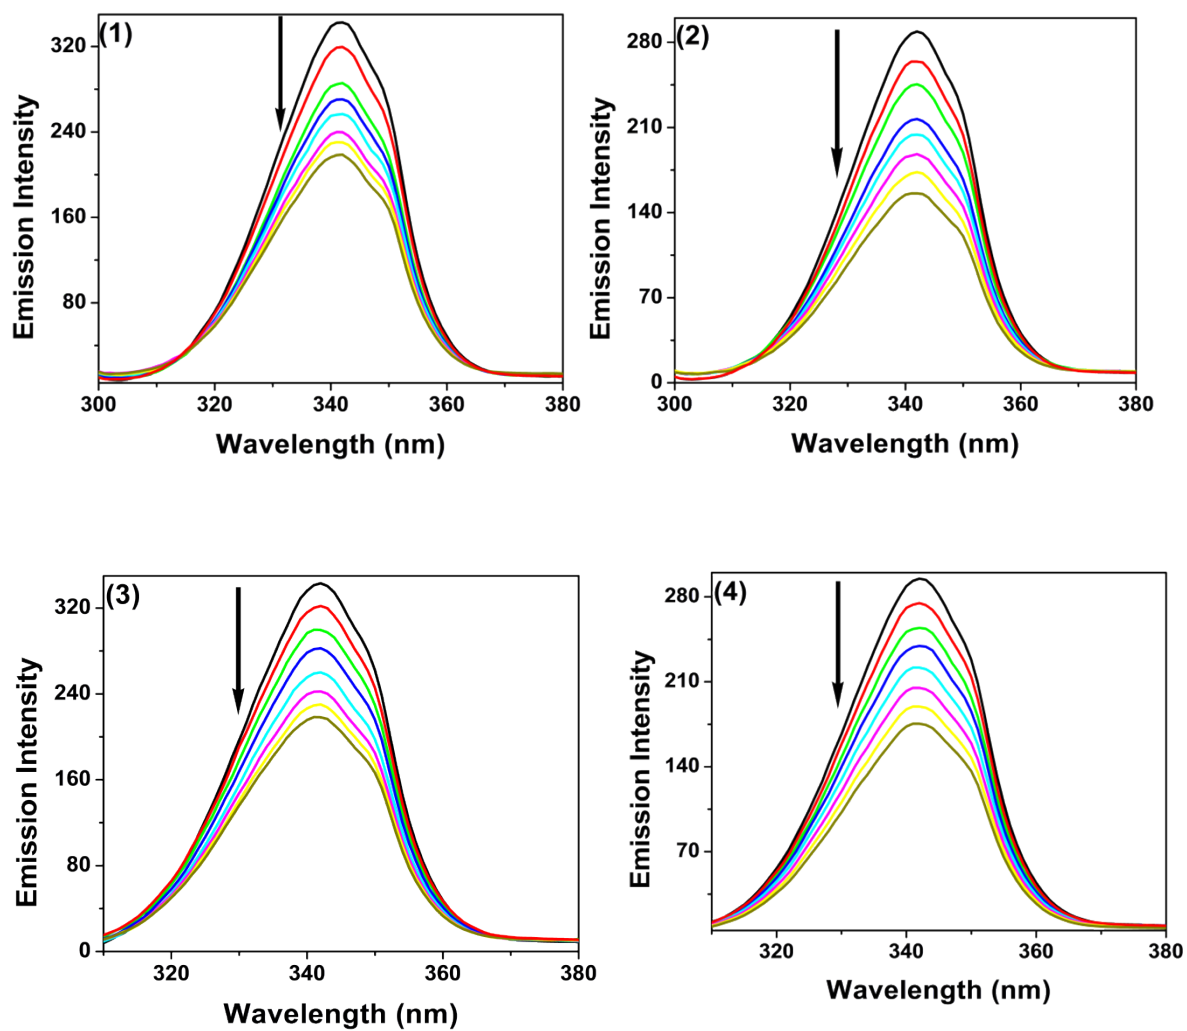

**Figure S5** Synchronous spectra of BSA ( $1 \mu\text{M}$ ) in the presence of increasing amounts of the complexes **1**, **2**, **3** and **4** ( $0$ - $14 \mu\text{M}$ ) at a wavelength difference of  $\Delta\lambda = 60 \text{ nm}$ . Arrow indicates the decrease of emission intensity as a function of increasing concentration of the compounds.

**Table S1** Selected bond lengths (Å) and angles (°) for the complex **1** and **4**

|                   | Complex <b>1</b> | Complex <b>4</b> |
|-------------------|------------------|------------------|
| Ru(1) – S(2)      | 2.236(10)        | 2.2368(8)        |
| Ru(1) – Cl(2)     | 2.370(10)        | 2.4124(8)        |
| Ru(1) – Cl(1)     | 2.401(11)        | 2.3703(8)        |
| Ru(1) – O(1)      | 2.086 (2)        | 2.103(2)         |
| Ru(1) – S(1)      | 2.250 (10)       |                  |
| Ru(1) – S(3)      |                  | 2.2467(8)        |
| O(1)-Ru(1)-S(2)   | 175.94(8)        | 175.83(6)        |
| O(1)-Ru(1)-Cl(2)  | 87.75(8)         | 88.14(6)         |
| S(2)-Ru(1)-Cl(2)  | 91.49(4)         | 92.22(3)         |
| O(1)-Ru(1)-Cl(1)  | 87.96(8)         | 87.79(6)         |
| S(2)-Ru(1)-Cl(1)  | 92.48(4)         | 91.57(3)         |
| Cl(2)-Ru(1)-Cl(1) | 173.98(4)        | 174.43(3)        |
| N(1)-Ru(1)-S(2)   | 99.32(8)         | 99.10(7)         |
| N(1)-Ru(1)-Cl(1)  | 89.30(8)         | 84.75(7)         |
| O(1)-Ru(1)-N(1)   | 76.66(1)         |                  |
| O(1)-Ru(1)-S(1)   | 90.89(7)         |                  |
| N(1)-Ru(1)-S(1)   | 167.53(8)        |                  |
| S(2)-Ru(1)-S(1)   | 93.14(4)         |                  |
| N(1)-Ru(1)-Cl(2)  | 85.60(8)         |                  |
| S(1)-Ru(1)-Cl(2)  | 94.45(4)         |                  |
| S(1)-Ru(1)-Cl(1)  | 89.85(4)         |                  |
| S(2)-Ru(1)-S(3)   |                  | 92.93(3)         |
| O(1)-Ru(1)-N(1)   |                  | 76.74(9)         |
| O(1)-Ru(1)-S(3)   |                  | 91.23(6)         |
| N(1)-Ru(1)-S(3)   |                  | 167.95(7)        |
| S(3)-Ru(1)-Cl(1)  |                  | 94.28(3)         |
| N(1)-Ru(1)-Cl(2)  |                  | 90.61(7)         |
| S(3)-Ru(1)-Cl(2)  |                  | 89.62(3)         |

**Table S2** Results of interaction study of compounds **1–4** with DNA

| Compounds | Absorption wavelength (nm) (absence of DNA) | Shift of wavelength (nm) (presence of DNA) | Nature of shift | Change in intensity |
|-----------|---------------------------------------------|--------------------------------------------|-----------------|---------------------|
| <b>1</b>  | 262                                         | 1                                          | Red             | 26.57 (hyper)       |
|           | 318                                         | 1                                          | Red             | 8.69 (hypo)         |
|           | 378                                         | -                                          | -               | 10.87 (hypo)        |
| <b>2</b>  | 263                                         | -                                          | -               | 34.14 (hyper)       |
|           | 331                                         | 1                                          | Red             | 8.38 (hypo)         |
|           | 383                                         | -                                          | -               | 11.72 (hypo)        |

|   |     |   |     |               |
|---|-----|---|-----|---------------|
| 3 | 419 | - | -   | 9.86 (hypo)   |
|   | 447 | - | -   | 6.73 (hypo)   |
|   | 320 | - | -   | 13.28 (hypo)  |
|   | 332 | 2 | Red | 11.79 (hypo)  |
|   | 372 | - | -   | 13.51 (hypo)  |
|   | 451 | - | -   | 10.40 (hypo)  |
| 4 | 259 | - | -   | 25.44 (hyper) |
|   | 330 | - | -   | 10.05 (hypo)  |
|   | 379 | - | -   | 10.95 (hypo)  |
|   | 446 | - | -   | 7.38 (hypo)   |

**Table S3** Results of interaction study of compounds 1–4 with EB-DNA

| Complex | EB expt @ 605 nm | DNA binding          |                        |
|---------|------------------|----------------------|------------------------|
|         | % hypochromism   | $K_q$ ( $M^{-1}$ )   | $K_{app}$ ( $M^{-1}$ ) |
| 1       | 13.58            | $1.4758 \times 10^3$ | $7.4210 \times 10^4$   |
| 2       | 47.81            | $9.0270 \times 10^3$ | $4.5165 \times 10^5$   |
| 3       | 18.54            | $2.2401 \times 10^3$ | $1.1199 \times 10^5$   |
| 4       | 31.81            | $4.4309 \times 10^3$ | $2.2948 \times 10^5$   |

**Table S4** Comparison of data related to interaction between compounds 1–4 and protein

| Complex | Protein binding experiment |                 |                 | Binding constants                 |                              | Binding sites |
|---------|----------------------------|-----------------|-----------------|-----------------------------------|------------------------------|---------------|
|         | Emission @345nm, (%hypo)   | S15@303 (%hypo) | S60@342 (%hypo) | $K_{sv}$ ( $\times 10^5 M^{-1}$ ) | $K$ ( $\times 10^5 M^{-1}$ ) | n             |
| 1       | 38.27                      | 14.12           | 36.14           | 4.287                             | 0.5556                       | 0.8835        |
| 2       | 42.76                      | 21.29           | 46.08           | 4.823                             | 2.0219                       | 0.9465        |
| 3       | 40.98                      | 16.54           | 36.40           | 4.512                             | 1.4995                       | 0.9191        |
| 4       | 41.25                      | 20.38           | 40.54           | 4.800                             | 1.8975                       | 0.9406        |
